# Supplementary material for: Molecular Changes Induced in Melanoma by Cell Culturing in 3D Alginate Hydrogels
Source: MDPI journal article supplement (doi:10.3390/cancers13164111), 2021-08-15
Supplement: s1 [file s1]

# Supplementary Materials: Molecular Changes Induced in Melanoma by Cell Culturing in 3D Alginate Hydrogels

Melanie Kappelmann-Fenzl, Sonja K. Schmidt, Stefan Fischer, Rafael Schmid, Lisa Lämmerhirt, Lena Fischer, Stefan Schrüfer, Ingo Thievessen, Dirk W. Schubert, Alexander Matthies, Rainer Detsch, Aldo R. Boccaccini, Andreas Arkudas, Annika Kengelbach-Weigand and Anja K. Bosserhoff

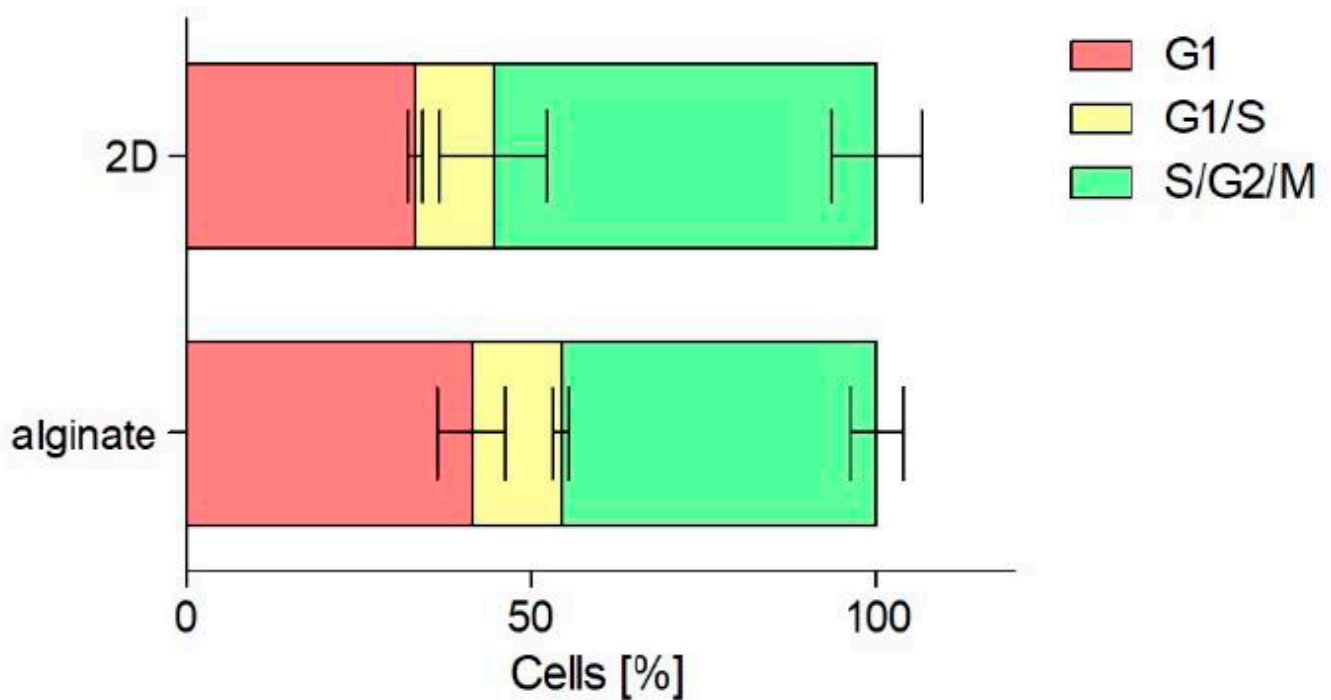

**Figure S1.** Quantification of cell cycle state of Mel Im FUCCI cells, determined from microscopy images taken on day 1 after seeding in 2D or 3D alginate, respectively.

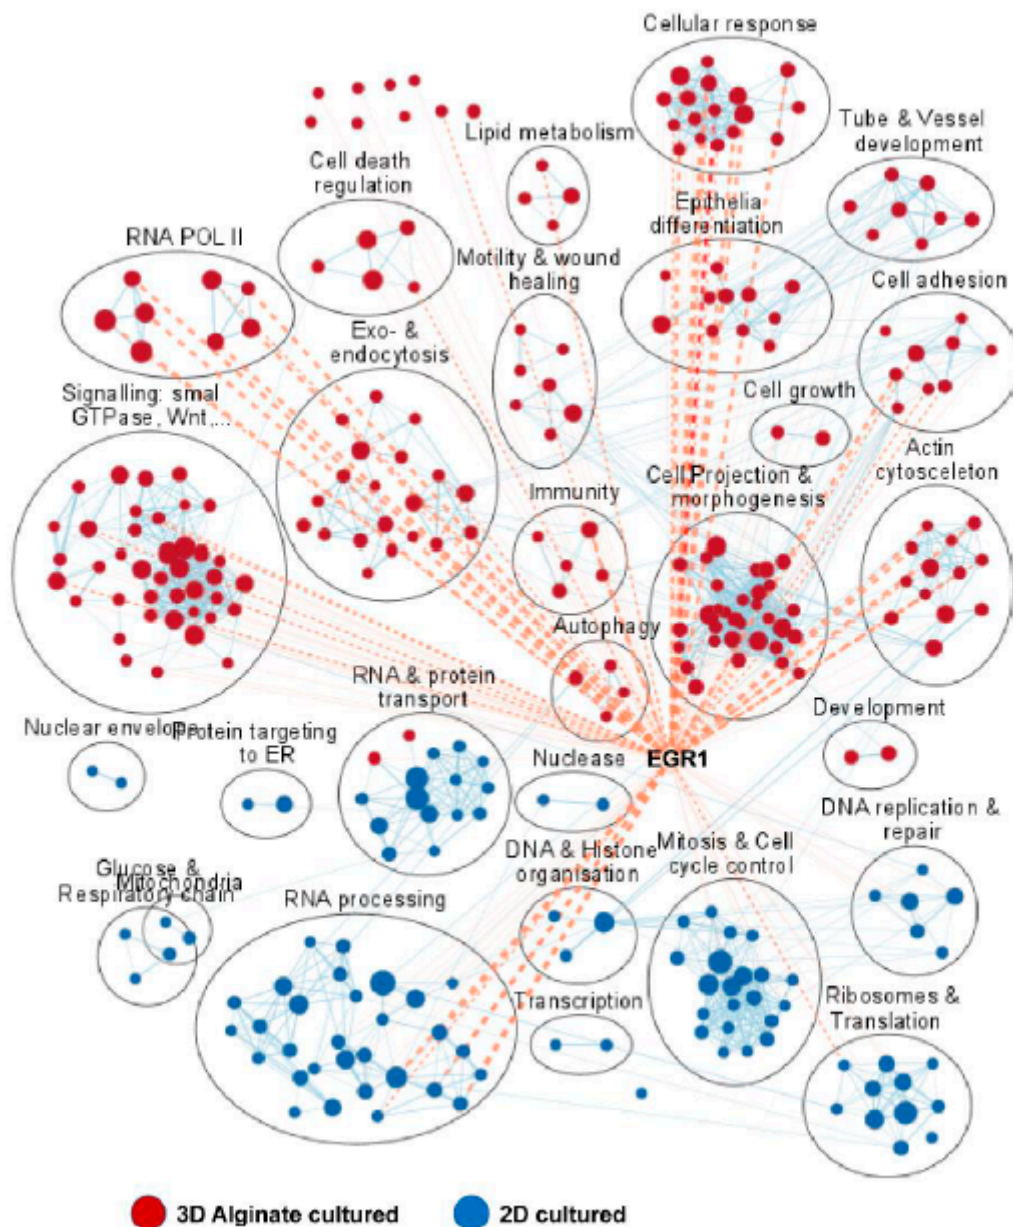

**Figure S2.** Enrichment map from Figure 2C with annotation of known EGR1 target genes.
